# Supplementary material
Source: publisher figshare collection journal article supplement (https://acs.figshare.com/ndownloader/files/3772930)
Supplement: Supplementary file 1 [file 3772930]

 
data_shelxl 
 
_audit_creation_method            SHELXL-97 
_chemical_name_systematic 
; 
 ? 
; 
_chemical_name_common             ? 
_chemical_melting_point           ? 
_chemical_formula_moiety          'C32 H22 N6'  
_chemical_formula_sum 
 'C32 H22 N6' 
_chemical_formula_weight          490.56 
 
loop_ 
 _atom_type_symbol 
 _atom_type_description 
 _atom_type_scat_dispersion_real 
 _atom_type_scat_dispersion_imag 
 _atom_type_scat_source 
 'C'  'C'   0.0181   0.0091 
 'International Tables Vol C Tables 4.2.6.8 and 6.1.1.4' 
 'H'  'H'   0.0000   0.0000 
 'International Tables Vol C Tables 4.2.6.8 and 6.1.1.4' 
 'N'  'N'   0.0311   0.0180 
 'International Tables Vol C Tables 4.2.6.8 and 6.1.1.4' 
 
_symmetry_cell_setting            Monoclinic 
_symmetry_space_group_name_H-M    'P 21/c' 
 
loop_ 
 _symmetry_equiv_pos_as_xyz 
 'x, y, z' 
 '-x, y+1/2, -z+1/2' 
 '-x, -y, -z' 
 'x, -y-1/2, z-1/2' 
 
_cell_length_a                    13.4407(11) 
_cell_length_b                    21.762(2) 
_cell_length_c                    8.4346(8) 
_cell_angle_alpha                 90.00 
_cell_angle_beta                  99.174(9) 
_cell_angle_gamma                 90.00 
_cell_volume                      2435.6(4) 
_cell_formula_units_Z             4 
_cell_measurement_temperature     100(2) 
_cell_measurement_reflns_used     1488
_cell_measurement_theta_min       3.3282
_cell_measurement_theta_max       67.2376

 
_exptl_crystal_description        rods 
_exptl_crystal_colour             brown-red 
_exptl_crystal_size_max           0.29 
_exptl_crystal_size_mid           0.03 
_exptl_crystal_size_min           0.02 
_exptl_crystal_density_meas       ? 
_exptl_crystal_density_diffrn     1.338 
_exptl_crystal_density_method     'not measured' 
_exptl_crystal_F_000              1024 
_exptl_absorpt_coefficient_mu     0.645 
_exptl_absorpt_correction_type    'multi-scan' 
_exptl_absorpt_correction_T_min   0.79899 
_exptl_absorpt_correction_T_max   1.00000 

_exptl_absorpt_process_details    
'Empirical absorption correction (CrysAlis RED, Oxford Diffraction)'   
 
 
_exptl_special_details 
; 
 ? 
; 
 
_diffrn_ambient_temperature       100(2) 
_diffrn_radiation_wavelength      1.54184 
_diffrn_radiation_type            CuK\a 
_diffrn_radiation_source          'SuperNova (Cu) X-ray Source'
_diffrn_radiation_monochromator   'mirror' 
_diffrn_measurement_device_type   'SuperNova, Dual, Cu at zero, Atlas'
_diffrn_measurement_method        '\w scans'
_diffrn_detector_area_resol_mean  10.4223 
 

_diffrn_standards_number          ? 
_diffrn_standards_interval_count  ? 
_diffrn_standards_interval_time   ? 
_diffrn_standards_decay_%         ? 
_diffrn_reflns_number             8791 
_diffrn_reflns_av_R_equivalents   0.0377 
_diffrn_reflns_av_sigmaI/netI     0.0652 
_diffrn_reflns_limit_h_min        -10 
_diffrn_reflns_limit_h_max        16 
_diffrn_reflns_limit_k_min        -25 
_diffrn_reflns_limit_k_max        24 
_diffrn_reflns_limit_l_min        -10 
_diffrn_reflns_limit_l_max        9 
_diffrn_reflns_theta_min          3.33 
_diffrn_reflns_theta_max          67.00 
_reflns_number_total              4289 
_reflns_number_gt                 2100 
_reflns_threshold_expression      >2sigma(I) 
 
_computing_data_collection        ? 
_computing_cell_refinement        ? 
_computing_data_reduction         ? 
_computing_structure_solution     'SHELXS-97 (Sheldrick, 1990)' 
_computing_structure_refinement   'SHELXL-97 (Sheldrick, 1997)' 
_computing_molecular_graphics     ? 
_computing_publication_material   ? 
 
_refine_special_details 
; 
 Refinement of F^2^ against ALL reflections.  The weighted R-factor wR and 
 goodness of fit S are based on F^2^, conventional R-factors R are based 
 on F, with F set to zero for negative F^2^. The threshold expression of 
 F^2^ > 2sigma(F^2^) is used only for calculating R-factors(gt) etc. and is 
 not relevant to the choice of reflections for refinement.  R-factors based 
 on F^2^ are statistically about twice as large as those based on F, and R- 
 factors based on ALL data will be even larger. 
; 
 
_refine_ls_structure_factor_coef  Fsqd  
_refine_ls_matrix_type            full 
_refine_ls_weighting_scheme       calc  
_refine_ls_weighting_details 
 'calc w=1/[\s^2^(Fo^2^)+(0.1038P)^2^+0.0000P] where P=(Fo^2^+2Fc^2^)/3' 
_atom_sites_solution_primary      direct 
_atom_sites_solution_secondary    difmap 
_atom_sites_solution_hydrogens    geom 
_refine_ls_hydrogen_treatment     constr 
_refine_ls_extinction_method      SHELXL 
_refine_ls_extinction_coef        0.00045(18) 
_refine_ls_extinction_expression 
 'Fc^*^=kFc[1+0.001xFc^2^\l^3^/sin(2\q)]^-1/4^' 
_refine_ls_number_reflns          4289 
_refine_ls_number_parameters      344 
_refine_ls_number_restraints      0 
_refine_ls_R_factor_all           0.1282 
_refine_ls_R_factor_gt            0.0622 
_refine_ls_wR_factor_ref          0.2166 
_refine_ls_wR_factor_gt           0.1594 
_refine_ls_goodness_of_fit_ref    0.919 
_refine_ls_restrained_S_all       0.919 
_refine_ls_shift/su_max           0.000 
_refine_ls_shift/su_mean          0.000 
 
loop_ 
 _atom_site_label 
 _atom_site_type_symbol 
 _atom_site_fract_x 
 _atom_site_fract_y 
 _atom_site_fract_z 
 _atom_site_U_iso_or_equiv 
 _atom_site_adp_type 
 _atom_site_occupancy 
 _atom_site_symmetry_multiplicity 
 _atom_site_calc_flag 
 _atom_site_refinement_flags 
 _atom_site_disorder_assembly 
 _atom_site_disorder_group 
C1 C 0.6735(2) 0.04190(19) 0.4975(4) 0.0620(9) Uani 1 1 d . . . 
C2 C 0.4972(2) 0.05780(16) 0.2981(4) 0.0552(8) Uani 1 1 d . . . 
C3 C 0.5494(2) -0.00034(16) 0.3091(4) 0.0579(9) Uani 1 1 d . . . 
C4 C 0.5059(2) -0.04871(17) 0.2142(4) 0.0611(9) Uani 1 1 d . . . 
H4 H 0.5379 -0.0867 0.2210 0.073 Uiso 1 1 calc R . . 
C5 C 0.4151(2) -0.04129(16) 0.1086(4) 0.0562(8) Uani 1 1 d . . . 
C6 C 0.3682(2) 0.01817(16) 0.0952(4) 0.0562(8) Uani 1 1 d . . . 
C7 C 0.4096(2) 0.06682(16) 0.1892(4) 0.0575(8) Uani 1 1 d . . . 
H7 H 0.3789 0.1052 0.1793 0.069 Uiso 1 1 calc R . . 
C8 C 0.2858(2) -0.07853(16) -0.0788(4) 0.0592(9) Uani 1 1 d . . . 
C9 C 0.2345(2) -0.13217(18) -0.1671(4) 0.0644(9) Uani 1 1 d . . . 
C10 C 0.1583(3) -0.1247(2) -0.2948(5) 0.0800(11) Uani 1 1 d . . . 
H10 H 0.1376 -0.0853 -0.3279 0.096 Uiso 1 1 calc R . . 
C11 C 0.1124(3) -0.1748(2) -0.3739(6) 0.0881(13) Uani 1 1 d . . . 
H11 H 0.0620 -0.1692 -0.4618 0.106 Uiso 1 1 calc R . . 
C12 C 0.1407(3) -0.2336(2) -0.3238(6) 0.0845(13) Uani 1 1 d . . . 
H12 H 0.1091 -0.2675 -0.3771 0.101 Uiso 1 1 calc R . . 
C13 C 0.2150(4) -0.2416(2) -0.1961(6) 0.0924(13) Uani 1 1 d . . . 
H13 H 0.2346 -0.2810 -0.1615 0.111 Uiso 1 1 calc R . . 
C14 C 0.2615(3) -0.19066(19) -0.1174(5) 0.0867(12) Uani 1 1 d . . . 
H14 H 0.3119 -0.1963 -0.0294 0.104 Uiso 1 1 calc R . . 
C15 C 0.7731(2) 0.0362(2) 0.6024(4) 0.0685(10) Uani 1 1 d . . . 
C16 C 0.8023(3) 0.0767(2) 0.7270(4) 0.0719(11) Uani 1 1 d . . . 
H16 H 0.7586 0.1076 0.7487 0.086 Uiso 1 1 calc R . . 
C17 C 0.8973(3) 0.0714(2) 0.8206(5) 0.0790(12) Uani 1 1 d . . . 
H17 H 0.9161 0.0983 0.9057 0.095 Uiso 1 1 calc R . . 
C18 C 0.9632(3) 0.0267(2) 0.7877(5) 0.0912(14) Uani 1 1 d . . . 
H18 H 1.0266 0.0234 0.8501 0.109 Uiso 1 1 calc R . . 
C19 C 0.9349(3) -0.0128(3) 0.6625(6) 0.1034(16) Uani 1 1 d . . . 
H19 H 0.9799 -0.0426 0.6387 0.124 Uiso 1 1 calc R . . 
C20 C 0.8395(3) -0.0090(2) 0.5703(5) 0.0949(14) Uani 1 1 d . . . 
H20 H 0.8204 -0.0368 0.4872 0.114 Uiso 1 1 calc R . . 
C21 C 0.4907(3) 0.16022(17) 0.4126(4) 0.0656(9) Uani 1 1 d . . . 
C22 C 0.3974(3) 0.16250(19) 0.4609(5) 0.0782(11) Uani 1 1 d . . . 
H22 H 0.3649 0.1266 0.4841 0.094 Uiso 1 1 calc R . . 
C23 C 0.3529(4) 0.2195(2) 0.4743(5) 0.0908(13) Uani 1 1 d . . . 
H23 H 0.2899 0.2220 0.5061 0.109 Uiso 1 1 calc R . . 
C24 C 0.4023(4) 0.2729(2) 0.4404(6) 0.1037(17) Uani 1 1 d . . . 
H24 H 0.3730 0.3111 0.4509 0.124 Uiso 1 1 calc R . . 
C25 C 0.4946(4) 0.2689(2) 0.3913(8) 0.128(2) Uani 1 1 d . . . 
H25 H 0.5269 0.3045 0.3657 0.154 Uiso 1 1 calc R . . 
C26 C 0.5398(3) 0.2128(2) 0.3796(6) 0.0975(15) Uani 1 1 d . . . 
H26 H 0.6033 0.2105 0.3494 0.117 Uiso 1 1 calc R . . 
C27 C 0.2281(2) 0.07984(16) -0.0455(5) 0.0620(9) Uani 1 1 d . . . 
C28 C 0.1807(3) 0.1054(2) 0.0704(5) 0.0842(12) Uani 1 1 d . . . 
H28 H 0.1853 0.0869 0.1708 0.101 Uiso 1 1 calc R . . 
C29 C 0.1255(3) 0.1592(2) 0.0368(7) 0.0995(16) Uani 1 1 d . . . 
H29 H 0.0944 0.1777 0.1154 0.119 Uiso 1 1 calc R . . 
C30 C 0.1173(3) 0.1848(2) -0.1141(8) 0.1008(17) Uani 1 1 d . . . 
H30 H 0.0795 0.2204 -0.1375 0.121 Uiso 1 1 calc R . . 
C31 C 0.1642(3) 0.1584(2) -0.2307(6) 0.0945(15) Uani 1 1 d . . . 
H31 H 0.1582 0.1760 -0.3323 0.113 Uiso 1 1 calc R . . 
C32 C 0.2206(2) 0.10542(18) -0.1952(5) 0.0711(10) Uani 1 1 d . . . 
H32 H 0.2531 0.0873 -0.2727 0.085 Uiso 1 1 calc R . . 
N1 N 0.28297(19) 0.02315(13) -0.0132(3) 0.0592(7) Uani 1 1 d . . . 
N2 N 0.23792(19) -0.02527(14) -0.1049(3) 0.0611(7) Uani 1 1 d . . . 
N3 N 0.3726(2) -0.08944(13) 0.0217(3) 0.0629(8) Uani 1 1 d . . . 
N4 N 0.53867(18) 0.10159(13) 0.4022(3) 0.0581(7) Uani 1 1 d . . . 
N5 N 0.63003(19) 0.09617(14) 0.5008(3) 0.0636(8) Uani 1 1 d . . . 
N6 N 0.63713(19) -0.00769(14) 0.4107(3) 0.0623(8) Uani 1 1 d . . . 
 
loop_ 
 _atom_site_aniso_label 
 _atom_site_aniso_U_11 
 _atom_site_aniso_U_22 
 _atom_site_aniso_U_33 
 _atom_site_aniso_U_23 
 _atom_site_aniso_U_13 
 _atom_site_aniso_U_12 
C1 0.0457(17) 0.078(3) 0.061(2) 0.0051(19) 0.0060(15) -0.0025(18) 
C2 0.0419(15) 0.067(2) 0.0549(19) 0.0071(17) 0.0033(13) -0.0076(16) 
C3 0.0413(15) 0.067(2) 0.065(2) 0.0084(17) 0.0054(14) 0.0006(16) 
C4 0.0466(16) 0.064(2) 0.072(2) 0.0055(19) 0.0063(15) -0.0019(16) 
C5 0.0455(16) 0.057(2) 0.065(2) 0.0044(17) 0.0074(15) -0.0048(15) 
C6 0.0418(15) 0.062(2) 0.063(2) 0.0072(17) 0.0033(14) 0.0003(15) 
C7 0.0461(16) 0.060(2) 0.064(2) 0.0064(17) 0.0007(15) -0.0014(15) 
C8 0.0508(17) 0.062(2) 0.065(2) 0.0026(17) 0.0095(16) -0.0069(16) 
C9 0.0511(18) 0.067(2) 0.077(2) -0.0005(19) 0.0161(17) -0.0080(17) 
C10 0.058(2) 0.074(3) 0.105(3) -0.008(2) 0.006(2) -0.001(2) 
C11 0.066(2) 0.081(3) 0.112(3) -0.016(3) -0.003(2) -0.012(2) 
C12 0.071(2) 0.077(3) 0.108(4) -0.019(3) 0.023(2) -0.020(2) 
C13 0.108(3) 0.063(3) 0.102(3) 0.004(2) 0.005(3) -0.014(3) 
C14 0.095(3) 0.065(3) 0.094(3) 0.003(2) -0.003(2) -0.007(2) 
C15 0.0442(17) 0.092(3) 0.067(2) 0.004(2) 0.0042(16) -0.0009(19) 
C16 0.0537(19) 0.090(3) 0.070(2) 0.016(2) 0.0031(17) -0.0052(19) 
C17 0.0531(19) 0.105(3) 0.074(3) 0.015(2) -0.0053(18) -0.012(2) 
C18 0.0464(19) 0.131(4) 0.089(3) 0.020(3) -0.0092(19) -0.003(2) 
C19 0.058(2) 0.133(4) 0.111(4) 0.004(3) -0.014(2) 0.025(3) 
C20 0.062(2) 0.122(4) 0.095(3) -0.002(3) -0.007(2) 0.016(3) 
C21 0.0534(18) 0.061(2) 0.075(2) 0.0075(19) -0.0118(16) -0.0048(17) 
C22 0.074(2) 0.064(2) 0.096(3) 0.004(2) 0.011(2) 0.010(2) 
C23 0.093(3) 0.079(3) 0.095(3) -0.002(2) -0.003(2) 0.023(3) 
C24 0.103(4) 0.062(3) 0.126(4) -0.012(3) -0.044(3) 0.010(3) 
C25 0.088(3) 0.065(3) 0.206(6) 0.034(4) -0.057(4) -0.016(3) 
C26 0.062(2) 0.081(3) 0.139(4) 0.033(3) -0.017(2) -0.016(2) 
C27 0.0426(16) 0.063(2) 0.075(2) 0.0030(19) -0.0085(16) -0.0010(16) 
C28 0.055(2) 0.093(3) 0.097(3) 0.001(2) -0.009(2) 0.015(2) 
C29 0.063(2) 0.096(3) 0.128(4) -0.032(3) -0.021(3) 0.020(2) 
C30 0.051(2) 0.072(3) 0.166(5) 0.003(3) -0.023(3) 0.002(2) 
C31 0.056(2) 0.085(3) 0.135(4) 0.033(3) -0.009(2) 0.004(2) 
C32 0.0492(17) 0.075(3) 0.084(3) 0.013(2) -0.0062(17) -0.0037(18) 
N1 0.0472(14) 0.0553(17) 0.0722(18) 0.0007(14) 0.0003(13) -0.0032(13) 
N2 0.0520(15) 0.0616(18) 0.0666(18) -0.0030(15) -0.0005(13) -0.0038(14) 
N3 0.0510(15) 0.0652(19) 0.0709(18) 0.0010(15) 0.0049(13) -0.0061(14) 
N4 0.0431(13) 0.0645(18) 0.0634(17) 0.0095(14) -0.0023(12) -0.0024(13) 
N5 0.0416(14) 0.078(2) 0.0676(18) 0.0085(16) -0.0036(13) -0.0045(14) 
N6 0.0427(13) 0.072(2) 0.0697(18) 0.0085(16) 0.0007(13) -0.0009(14) 
 
_geom_special_details 
; 
 All esds (except the esd in the dihedral angle between two l.s. planes) 
 are estimated using the full covariance matrix.  The cell esds are taken 
 into account individually in the estimation of esds in distances, angles 
 and torsion angles; correlations between esds in cell parameters are only 
 used when they are defined by crystal symmetry.  An approximate (isotropic) 
 treatment of cell esds is used for estimating esds involving l.s. planes. 
; 
 
loop_ 
 _geom_bond_atom_site_label_1 
 _geom_bond_atom_site_label_2 
 _geom_bond_distance 
 _geom_bond_site_symmetry_2 
 _geom_bond_publ_flag 
C1 N5 1.320(4) . ? 
C1 N6 1.351(4) . ? 
C1 C15 1.487(4) . ? 
C2 N4 1.354(4) . ? 
C2 C7 1.387(4) . ? 
C2 C3 1.443(5) . ? 
C3 N6 1.352(4) . ? 
C3 C4 1.394(5) . ? 
C4 C5 1.400(4) . ? 
C4 H4 0.9300 . ? 
C5 N3 1.352(4) . ? 
C5 C6 1.436(5) . ? 
C6 N1 1.351(4) . ? 
C6 C7 1.385(4) . ? 
C7 H7 0.9300 . ? 
C8 N2 1.327(4) . ? 
C8 N3 1.350(4) . ? 
C8 C9 1.493(5) . ? 
C9 C14 1.371(5) . ? 
C9 C10 1.372(5) . ? 
C10 C11 1.373(5) . ? 
C10 H10 0.9300 . ? 
C11 C12 1.382(6) . ? 
C11 H11 0.9300 . ? 
C12 C13 1.358(6) . ? 
C12 H12 0.9300 . ? 
C13 C14 1.389(6) . ? 
C13 H13 0.9300 . ? 
C14 H14 0.9300 . ? 
C15 C16 1.380(5) . ? 
C15 C20 1.384(5) . ? 
C16 C17 1.394(5) . ? 
C16 H16 0.9300 . ? 
C17 C18 1.373(6) . ? 
C17 H17 0.9300 . ? 
C18 C19 1.369(6) . ? 
C18 H18 0.9300 . ? 
C19 C20 1.392(5) . ? 
C19 H19 0.9300 . ? 
C20 H20 0.9300 . ? 
C21 C26 1.371(5) . ? 
C21 C22 1.380(5) . ? 
C21 N4 1.439(4) . ? 
C22 C23 1.389(5) . ? 
C22 H22 0.9300 . ? 
C23 C24 1.391(6) . ? 
C23 H23 0.9300 . ? 
C24 C25 1.372(8) . ? 
C24 H24 0.9300 . ? 
C25 C26 1.374(7) . ? 
C25 H25 0.9300 . ? 
C26 H26 0.9300 . ? 
C27 C28 1.368(5) . ? 
C27 C32 1.369(5) . ? 
C27 N1 1.441(4) . ? 
C28 C29 1.391(6) . ? 
C28 H28 0.9300 . ? 
C29 C30 1.378(6) . ? 
C29 H29 0.9300 . ? 
C30 C31 1.375(7) . ? 
C30 H30 0.9300 . ? 
C31 C32 1.386(5) . ? 
C31 H31 0.9300 . ? 
C32 H32 0.9300 . ? 
N1 N2 1.388(4) . ? 
N4 N5 1.374(3) . ? 
 
loop_ 
 _geom_angle_atom_site_label_1 
 _geom_angle_atom_site_label_2 
 _geom_angle_atom_site_label_3 
 _geom_angle 
 _geom_angle_site_symmetry_1 
 _geom_angle_site_symmetry_3 
 _geom_angle_publ_flag 
N5 C1 N6 127.1(3) . . ? 
N5 C1 C15 114.9(3) . . ? 
N6 C1 C15 118.0(3) . . ? 
N4 C2 C7 123.2(3) . . ? 
N4 C2 C3 115.4(3) . . ? 
C7 C2 C3 121.3(3) . . ? 
N6 C3 C4 121.2(3) . . ? 
N6 C3 C2 120.7(3) . . ? 
C4 C3 C2 118.0(3) . . ? 
C3 C4 C5 121.4(3) . . ? 
C3 C4 H4 119.3 . . ? 
C5 C4 H4 119.3 . . ? 
N3 C5 C4 120.3(3) . . ? 
N3 C5 C6 120.9(3) . . ? 
C4 C5 C6 118.8(3) . . ? 
N1 C6 C7 123.1(3) . . ? 
N1 C6 C5 116.1(3) . . ? 
C7 C6 C5 120.8(3) . . ? 
C6 C7 C2 119.5(3) . . ? 
C6 C7 H7 120.3 . . ? 
C2 C7 H7 120.3 . . ? 
N2 C8 N3 127.3(3) . . ? 
N2 C8 C9 115.3(3) . . ? 
N3 C8 C9 117.4(3) . . ? 
C14 C9 C10 118.6(4) . . ? 
C14 C9 C8 119.7(3) . . ? 
C10 C9 C8 121.7(4) . . ? 
C9 C10 C11 120.5(4) . . ? 
C9 C10 H10 119.8 . . ? 
C11 C10 H10 119.8 . . ? 
C10 C11 C12 120.5(4) . . ? 
C10 C11 H11 119.8 . . ? 
C12 C11 H11 119.8 . . ? 
C13 C12 C11 119.6(4) . . ? 
C13 C12 H12 120.2 . . ? 
C11 C12 H12 120.2 . . ? 
C12 C13 C14 119.6(4) . . ? 
C12 C13 H13 120.2 . . ? 
C14 C13 H13 120.2 . . ? 
C9 C14 C13 121.2(4) . . ? 
C9 C14 H14 119.4 . . ? 
C13 C14 H14 119.4 . . ? 
C16 C15 C20 119.3(3) . . ? 
C16 C15 C1 121.3(3) . . ? 
C20 C15 C1 119.4(4) . . ? 
C15 C16 C17 120.2(4) . . ? 
C15 C16 H16 119.9 . . ? 
C17 C16 H16 119.9 . . ? 
C18 C17 C16 120.4(4) . . ? 
C18 C17 H17 119.8 . . ? 
C16 C17 H17 119.8 . . ? 
C19 C18 C17 119.4(4) . . ? 
C19 C18 H18 120.3 . . ? 
C17 C18 H18 120.3 . . ? 
C18 C19 C20 120.8(5) . . ? 
C18 C19 H19 119.6 . . ? 
C20 C19 H19 119.6 . . ? 
C15 C20 C19 119.9(4) . . ? 
C15 C20 H20 120.1 . . ? 
C19 C20 H20 120.1 . . ? 
C26 C21 C22 121.3(4) . . ? 
C26 C21 N4 119.5(3) . . ? 
C22 C21 N4 119.2(3) . . ? 
C21 C22 C23 118.6(4) . . ? 
C21 C22 H22 120.7 . . ? 
C23 C22 H22 120.7 . . ? 
C22 C23 C24 120.2(5) . . ? 
C22 C23 H23 119.9 . . ? 
C24 C23 H23 119.9 . . ? 
C25 C24 C23 119.6(5) . . ? 
C25 C24 H24 120.2 . . ? 
C23 C24 H24 120.2 . . ? 
C24 C25 C26 120.6(5) . . ? 
C24 C25 H25 119.7 . . ? 
C26 C25 H25 119.7 . . ? 
C21 C26 C25 119.6(4) . . ? 
C21 C26 H26 120.2 . . ? 
C25 C26 H26 120.2 . . ? 
C28 C27 C32 121.3(4) . . ? 
C28 C27 N1 119.7(3) . . ? 
C32 C27 N1 118.9(3) . . ? 
C27 C28 C29 119.4(4) . . ? 
C27 C28 H28 120.3 . . ? 
C29 C28 H28 120.3 . . ? 
C30 C29 C28 119.4(5) . . ? 
C30 C29 H29 120.3 . . ? 
C28 C29 H29 120.3 . . ? 
C31 C30 C29 120.9(4) . . ? 
C31 C30 H30 119.6 . . ? 
C29 C30 H30 119.6 . . ? 
C30 C31 C32 119.3(5) . . ? 
C30 C31 H31 120.3 . . ? 
C32 C31 H31 120.3 . . ? 
C27 C32 C31 119.7(4) . . ? 
C27 C32 H32 120.2 . . ? 
C31 C32 H32 120.2 . . ? 
C6 N1 N2 124.3(3) . . ? 
C6 N1 C27 123.3(3) . . ? 
N2 N1 C27 112.3(2) . . ? 
C8 N2 N1 114.5(3) . . ? 
C8 N3 C5 116.9(3) . . ? 
C2 N4 N5 124.6(3) . . ? 
C2 N4 C21 121.4(3) . . ? 
N5 N4 C21 113.9(3) . . ? 
C1 N5 N4 114.8(3) . . ? 
C1 N6 C3 116.9(3) . . ? 
 
_diffrn_measured_fraction_theta_max    0.991 
_diffrn_reflns_theta_full              67.00 
_diffrn_measured_fraction_theta_full   0.991 
_refine_diff_density_max    0.470 
_refine_diff_density_min   -0.226 
_refine_diff_density_rms    0.049 
